# Supplementary material for: Characterization and minimization of band broadening in DNA electrohydrodynamic migration for enhanced size separation
Source: Royal Society of Chemistry journal article supplement (doi:10.1039/d0sm00475h), 2020-01-01
Supplement: d0sm00475h1.pdf [file d0sm00475h1.pdf]

# Characterization of band broadening in DNA electrohydrodynamic migration for enhanced size separation

Jeffrey Teillet<sup>1</sup>, Quentin Martinez<sup>1</sup>, Inga Tijunelyte<sup>1</sup>, Bayan Chami<sup>1</sup>, Aurélien Bancaud<sup>1</sup>

## AFFILIATION

<sup>1</sup>CNRS, LAAS, 7 avenue du colonel Roche, F-31400, Toulouse, France.

## Supplementary Material

Width of the DNA band with an electric field linearly decreasing over time

Let us first evaluate the passage time  $t_p$  in front of the detector. For this, we invert the migration velocity knowing the distance to the detector  $L_p$ :

$$L_p = \int_0^{t_p} U_{VE}(u).du \quad (\text{S1})$$

The electrohydrodynamic velocity is given by (Eq. (9)) and we define the slope  $\alpha$  of the decrease of the electric field as :

$$U_{VE}(t) = \frac{6U_h}{H} \langle \varepsilon \rangle(t) - U_e(t) = \frac{6U_h}{H} \sqrt{\frac{2k_B T}{\pi} \frac{H^2}{\alpha \mu \tau U_h U_e(t)}} - U_e(t) \quad (\text{S2})$$

Integration of Eq. (S2) leads to the following polynomial equation, that can be solved numerically to determine  $t_p$ :

$$L_p = \frac{U_0^2}{2\alpha} (1 - \alpha t_p / U_0)^2 - \frac{2K\sqrt{U_0}}{\alpha} \sqrt{1 - \alpha t_p / U_0} - \frac{U_0^2}{2\alpha} + \frac{2K\sqrt{U_0}}{\alpha}$$
$$K = \frac{6U_h}{H} \sqrt{\frac{2k_B T}{\pi} \frac{H^2}{\alpha \mu \tau U_h}} = \sqrt{\frac{72}{\pi}} \sqrt{\frac{k_B T U_h}{\alpha \mu \tau}} \quad (\text{S3})$$

The width of the band is finally determined using Eq. (11) according to:

$$w_p = w_0 + \sqrt{2 \times 44 \times \frac{H^2}{\tau^2} \times \int_0^{t_p} \frac{dt}{(U_0 - \alpha.t)^2}} \quad (S4)$$

These equations are solved numerically with the following set of parameters:  $k_B = 6 \cdot 10^{-23}$  J/K;  $T = 300$  K ;  $a = (N_{bp}/300) \cdot k = 200$  nm ;  $\tau = 0.5 \cdot 10^{-3}$  s ;  $\mu = 30 \cdot 10^{-3}$  Pa.s ;  $H = 2 \cdot 10^{-6}$  m ;  $L_p = 1.3$  mm ;  $U_h = 1.7 \cdot 10^{-3}$  m/s ;  $w_0 = 0.05$  mm. The value of  $U_0$  is computed from the conditions of arrest at  $t=0$  (Eq. S2), yielding  $U_0 = 800$   $\mu$ m/s.

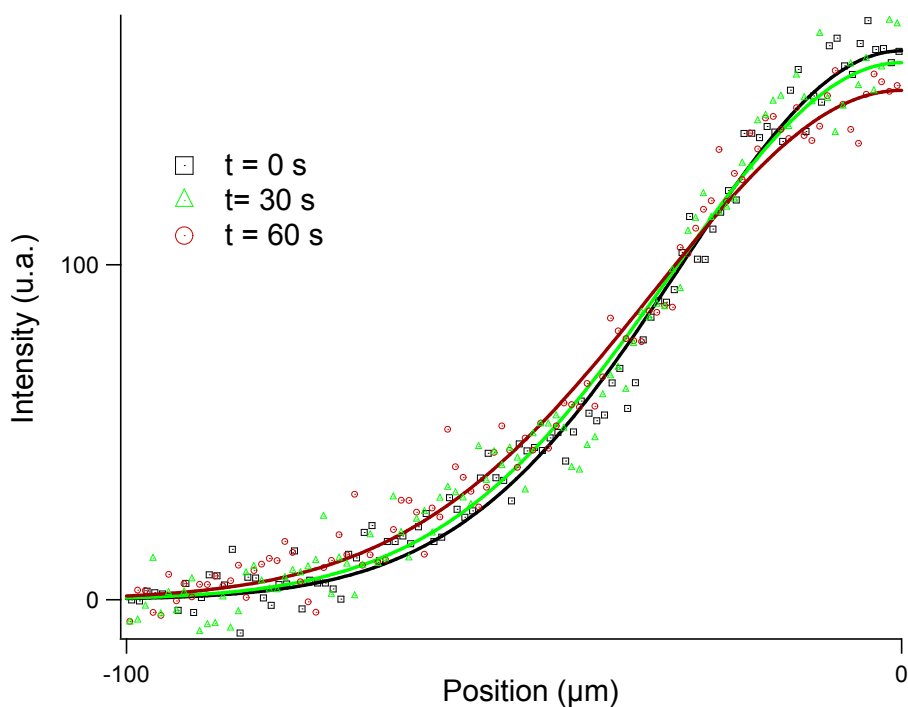

**Figure S1:** The plot presents the half-spatial intensity distribution of a 600 bp DNA band. Spreads is due to Brownian dispersion. Each dataset is fitted with a Gaussian function (solid lines).

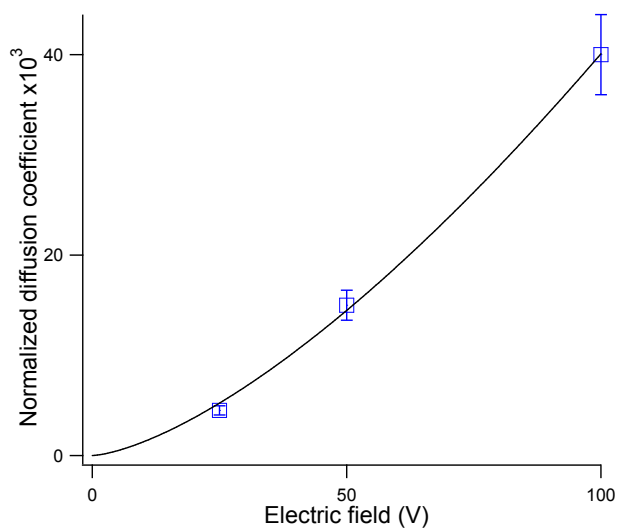

**Figure S2:** The plot presents the steady value of the normalized electrophoretic diffusion coefficient, inferred from Fig. 3, as a function of the electric field. The solid line is a fit of the data associated to a power-law scaling response of 1.47, given that the normalized diffusion coefficient is set to 1 at zero electric field.

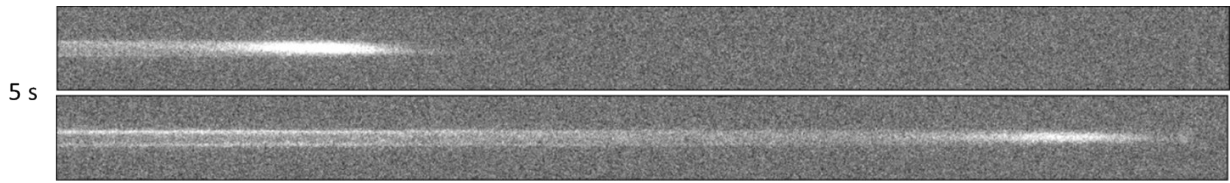

**Figure S3:** The two fluorescence micrographs present the migration of a DNA band with a constant electric field of 20 V and a pressure of 2 bar. The time interval between the two images is 5 s. The band appears to “leak” near the side walls. This result is due to the boundary conditions for a rectangular channel of 10  $\mu\text{m}$  in width and 2  $\mu\text{m}$  in height. The flow velocity field is slowed down near the walls over a distance of  $\sim 1 \mu\text{m}$ . The electric field is thus comparatively higher in this region, and the band migration is further slowed down.
